# Supplementary material for: Preparative Production of Functionalized (N- and O-Heterocyclic) Polycyclic Aromatic Hydrocarbons by Human Cytochrome P450 3A4 in a Bioreactor
Source: MDPI journal article supplement (doi:10.3390/biom12020153), 2022-01-18
Supplement: s1 [file s1]

# Biomolecules

## Supporting Information

for

### **Preparative Production of Functionalized (*N*- and *O*-Heterocyclic) Polycyclic Aromatic Hydrocarbons by Human Cytochrome P450 Enzyme 3A4 in a Bioreactor**

Matic Srđić <sup>1,2</sup>, Nico D. Fessner <sup>3</sup>, Deniz Yildiz <sup>4,5</sup>, Anton Glieder <sup>6</sup>,  
Markus Spiertz <sup>1\*</sup>, Ulrich Schwaneberg <sup>2,4,\*</sup>

<sup>1</sup> SeSaM-Biotech GmbH, Aachen, Germany; [srdic@sesam-biotech.com](mailto:srdic@sesam-biotech.com) (M.Sr.), [spiertz@sesam-biotech.com](mailto:spiertz@sesam-biotech.com) (M.Sp.)

<sup>2</sup> Institute of Biotechnology, RWTH Aachen University, Aachen, Germany; [u.schwaneberg@biotec.rwth-aachen.de](mailto:u.schwaneberg@biotec.rwth-aachen.de) (U.S.)

<sup>3</sup> Institute of Molecular Biotechnology, Graz University of Technology, NAWI Graz, Graz, Austria; [nico.fessner11@alumni.imperial.ac.uk](mailto:nico.fessner11@alumni.imperial.ac.uk) (N.D.F.), [a.glieder@tugraz.at](mailto:a.glieder@tugraz.at) (A.G.)

<sup>4</sup> DWI—Leibniz Institute for Interactive Materials, Aachen, Germany; [yildiz@dwz.rwth-aachen.de](mailto:yildiz@dwz.rwth-aachen.de) (D.Y.)

<sup>5</sup> Institute for Technical and Macromolecular Chemistry, RWTH Aachen University, Aachen, Germany.

<sup>6</sup> Bisys GmbH, Hofstaetten/Raab, Austria; [anton.glieder@bisys.at](mailto:anton.glieder@bisys.at) (A.G.)

\* Correspondence: [spiertz@sesam-biotech.com](mailto:spiertz@sesam-biotech.com); [u.schwaneberg@biotec.rwth-aachen.de](mailto:u.schwaneberg@biotec.rwth-aachen.de)

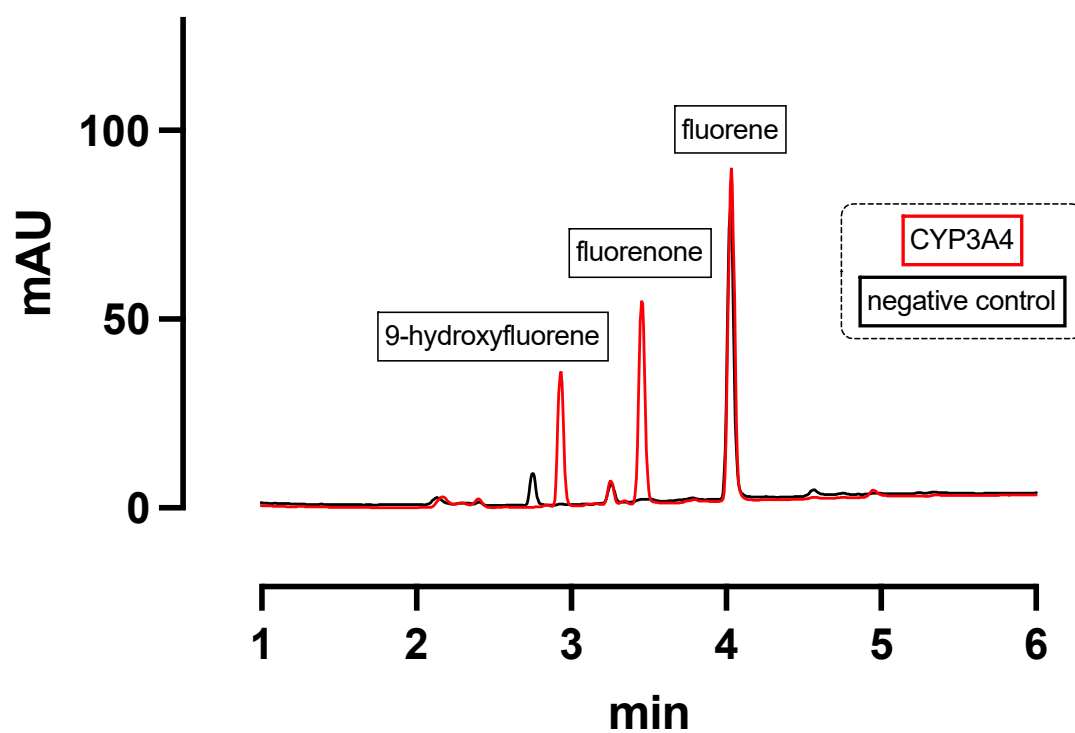

Figure S1: HPLC profile of fluorene conversion catalysed by CYP3A4.

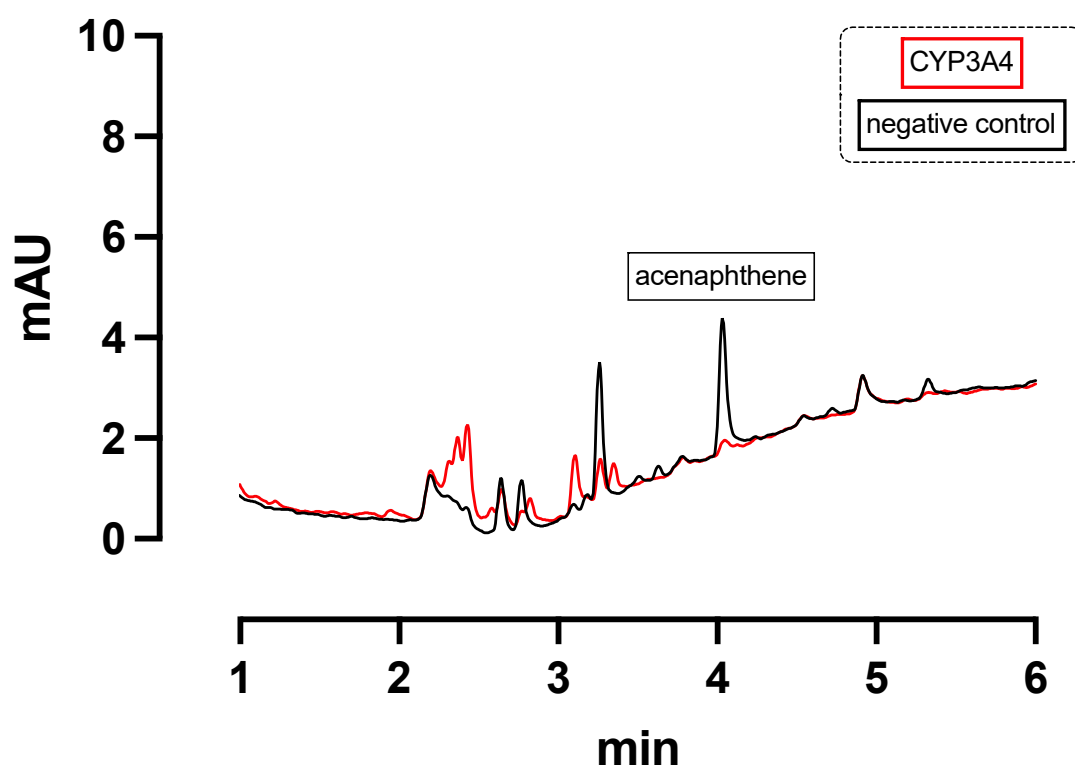

Figure S2: HPLC profile of acenaphthene conversion catalysed by CYP3A4.

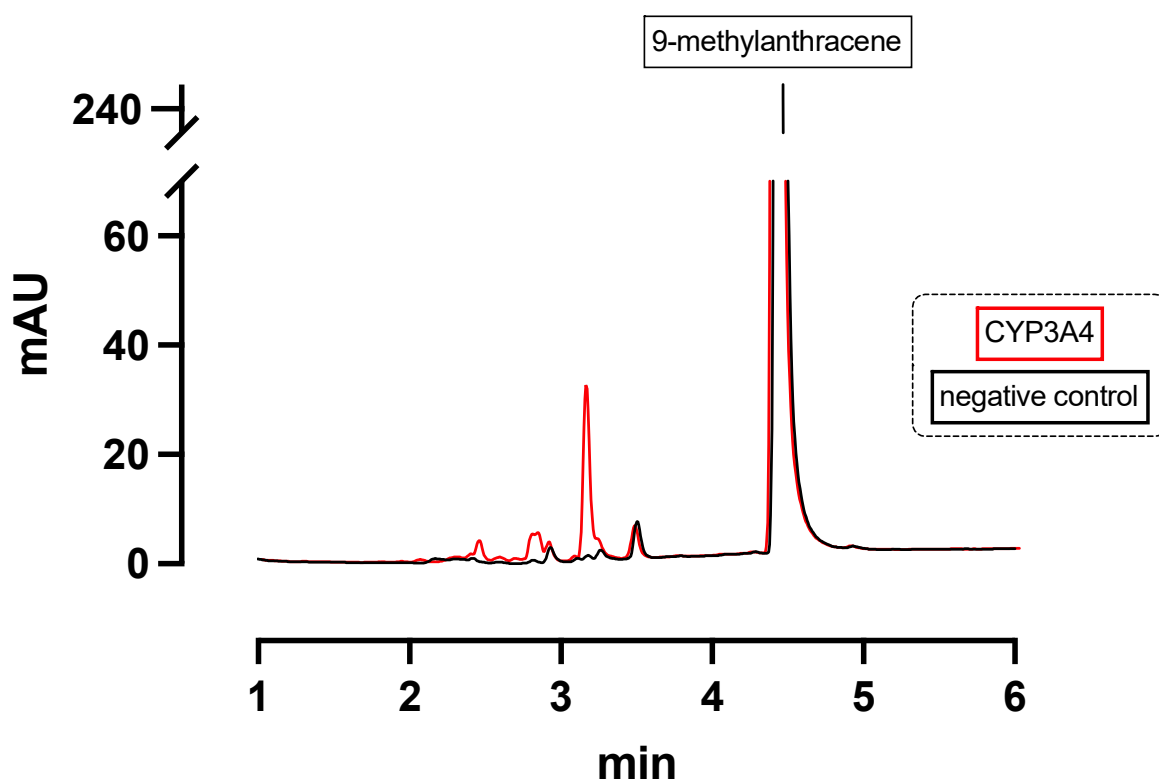

Figure S3: HPLC profile of 9-methylanthracene conversion catalysed by CYP3A4.

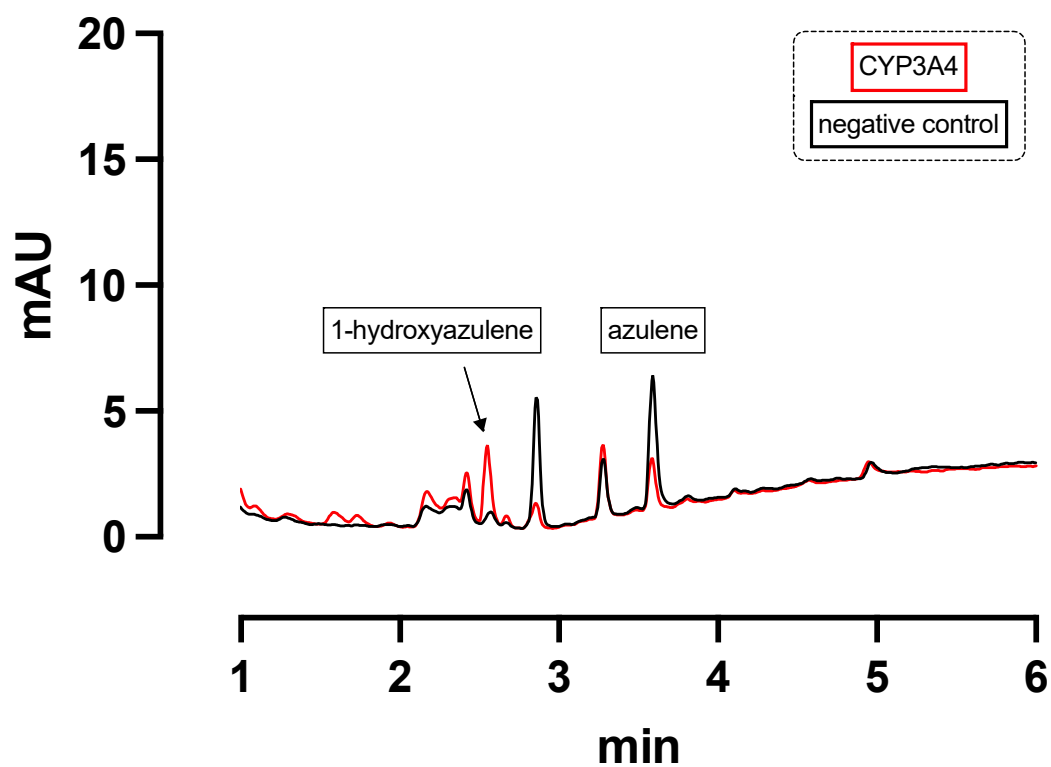

Figure S4: HPLC profile of azulene conversion catalysed by CYP3A4.

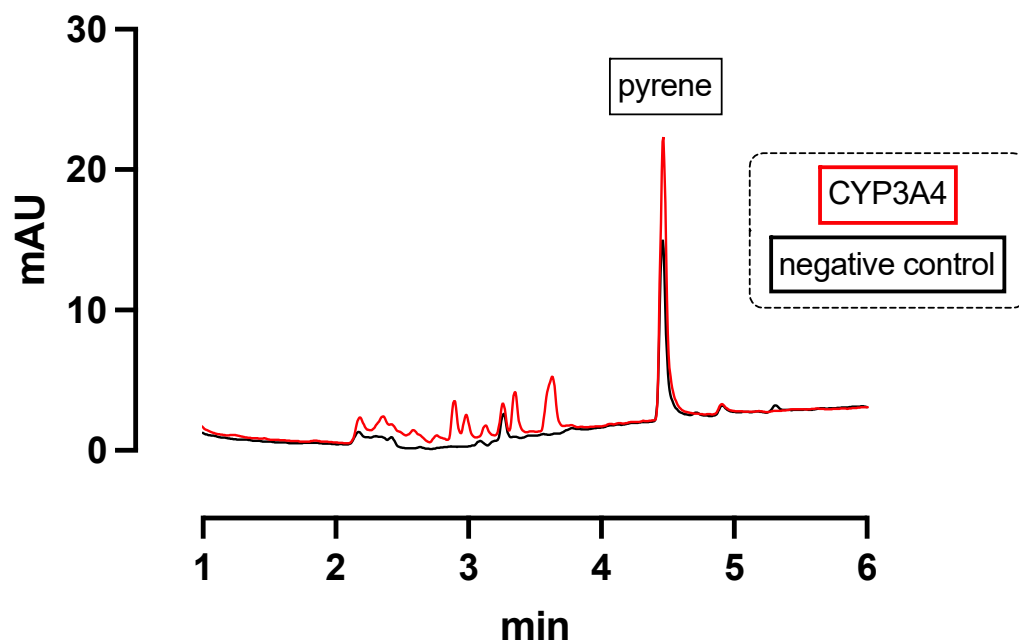

Figure S5: HPLC profile of pyrene conversion catalysed by CYP3A4.

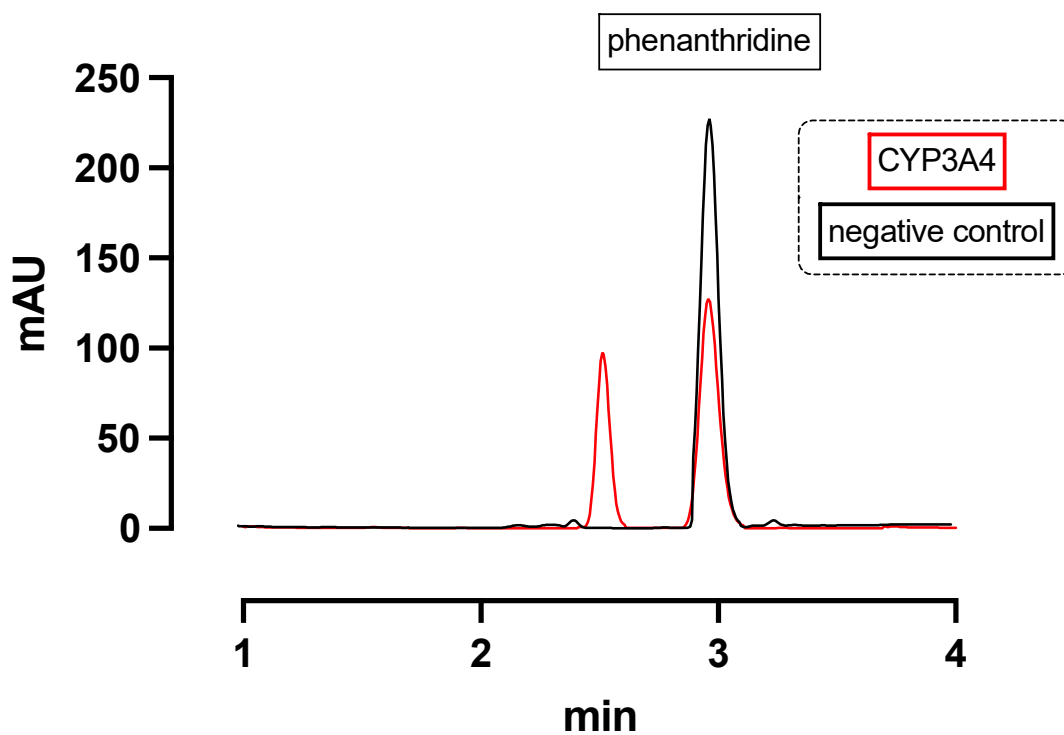

Figure S6: HPLC profile of phenanthridine conversion catalysed by CYP3A4.

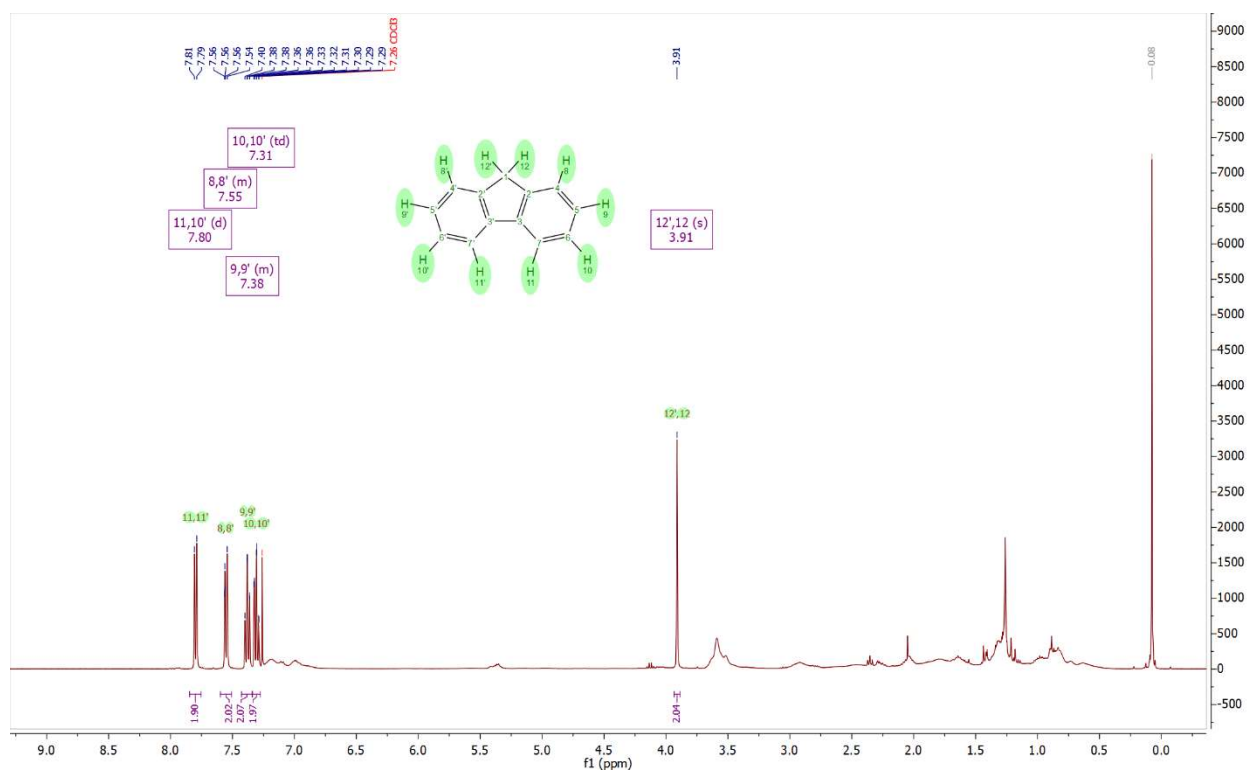

**Figure S7:** <sup>1</sup>H NMR Spectrum of 9H-Fluorene.

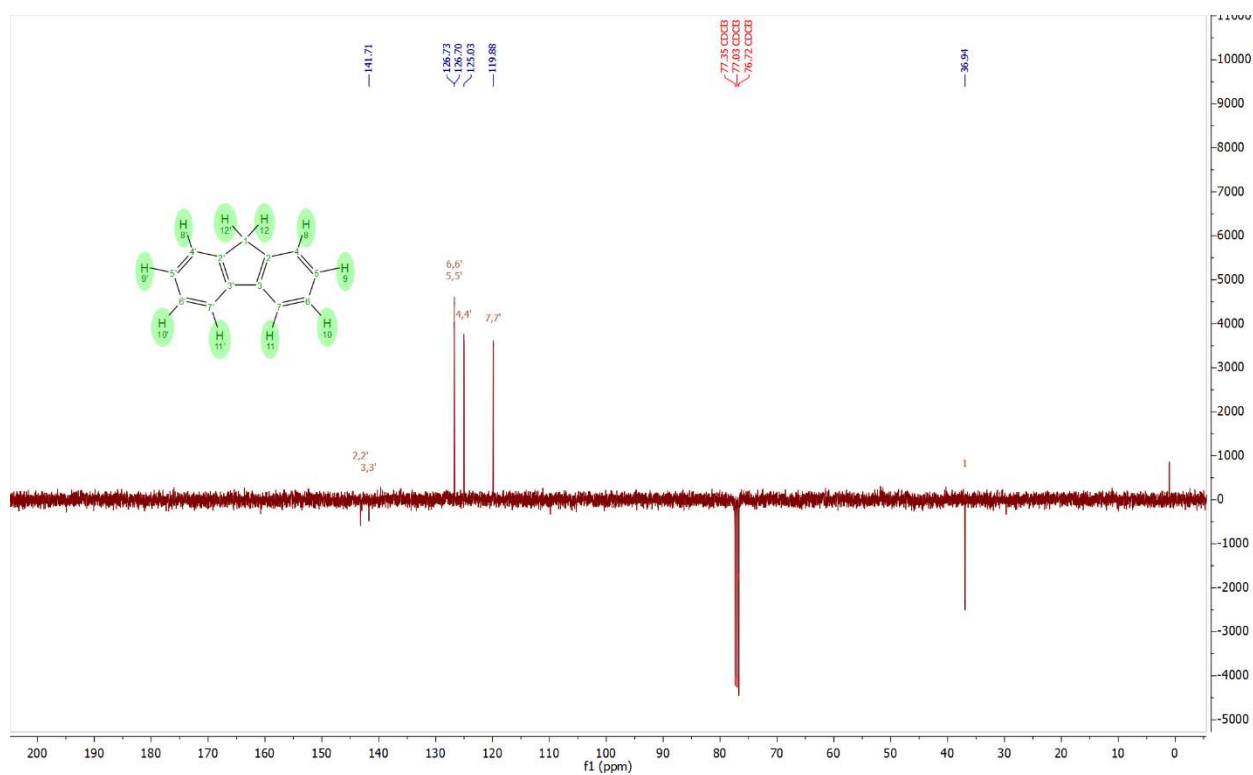

**Figure S8:** <sup>13</sup>C NMR Spectrum of 9H-Fluorene.

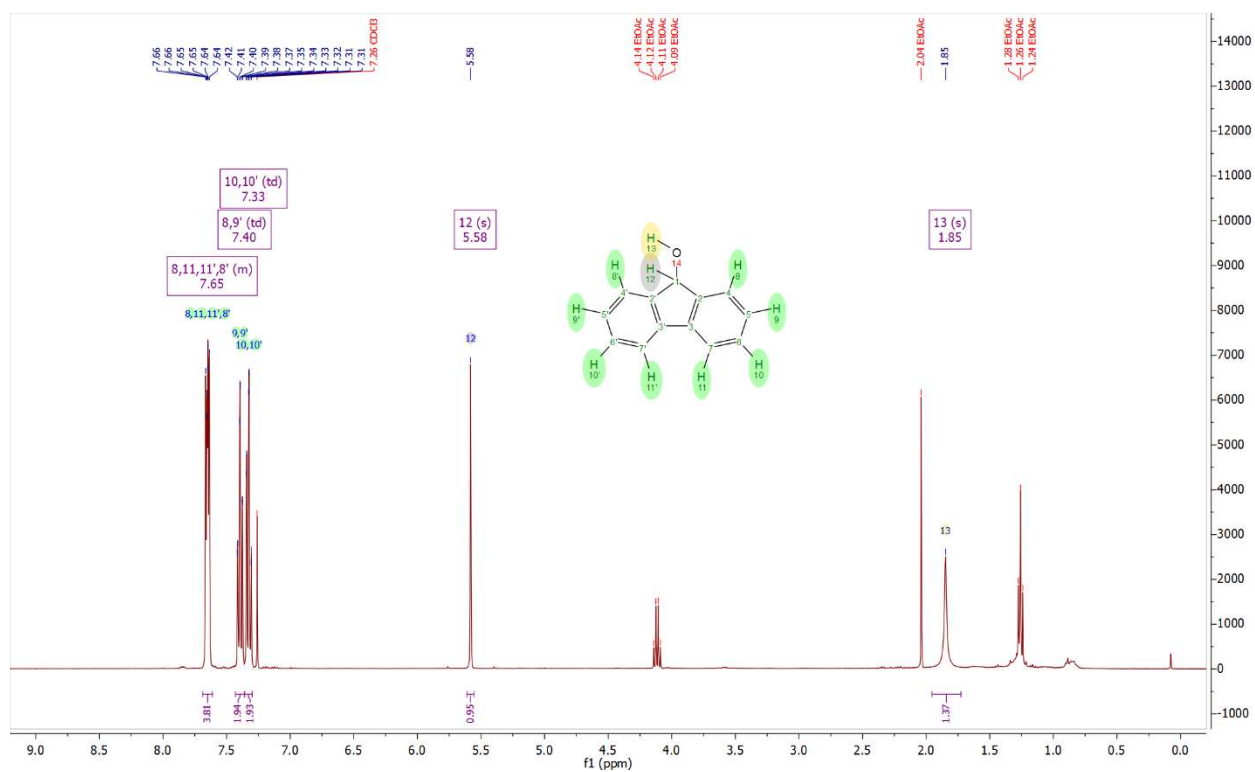

**Figure S9:** <sup>1</sup>H NMR Spectrum of 9-hydroxyfluorene.

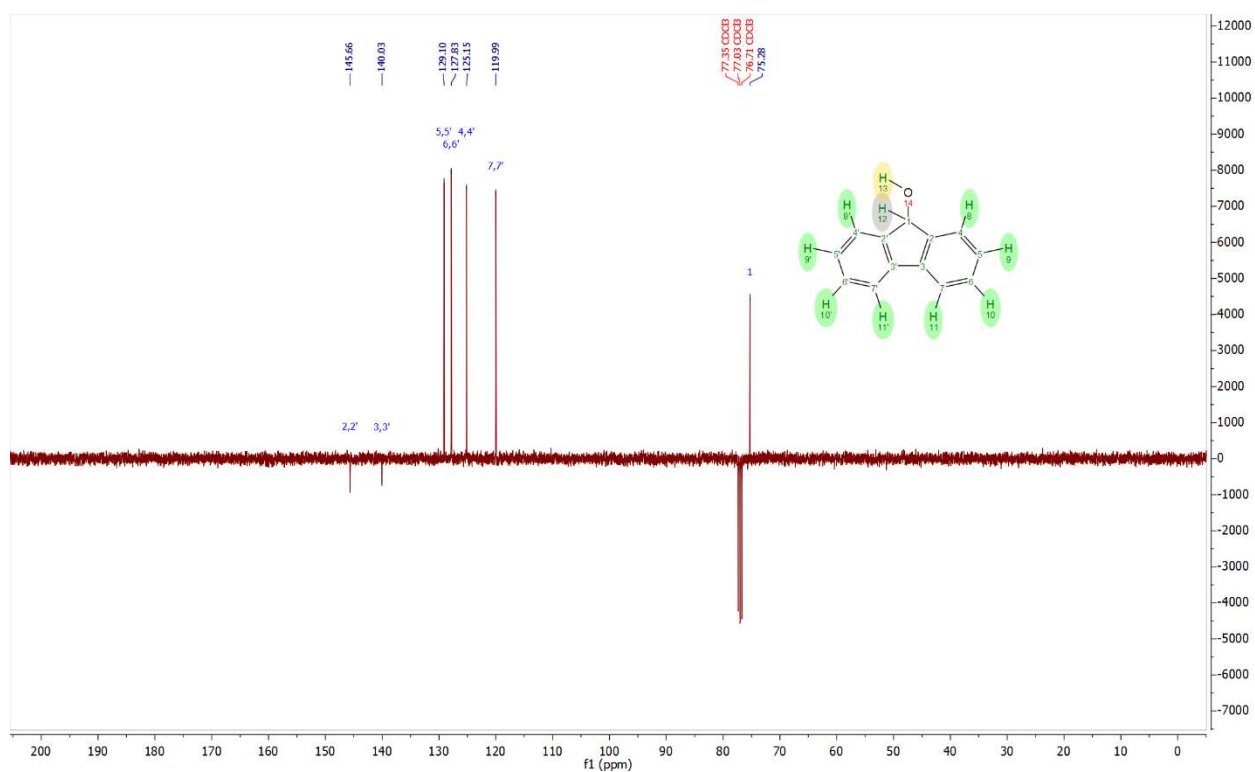

**Figure S10:** <sup>13</sup>C NMR Spectrum of 9-hydroxyfluorene.

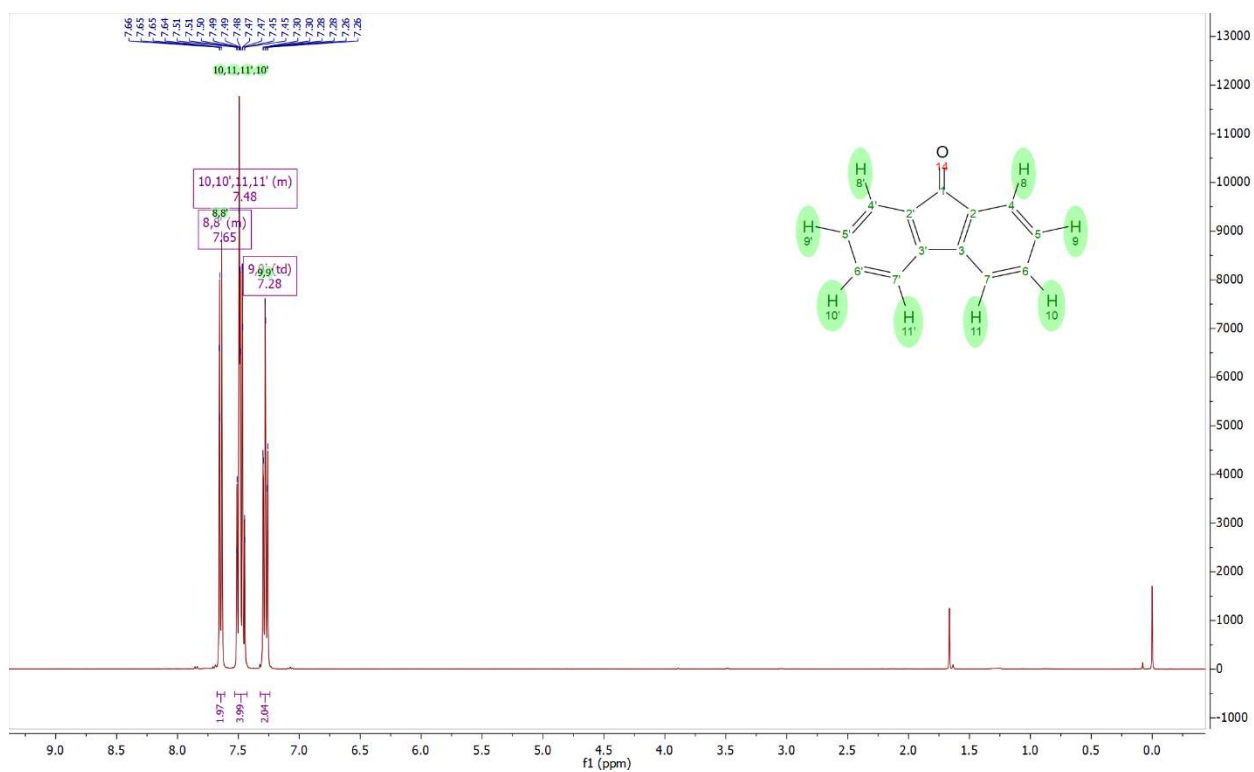

**Figure S11:** <sup>1</sup>H NMR Spectrum of 9-Fluorenone.

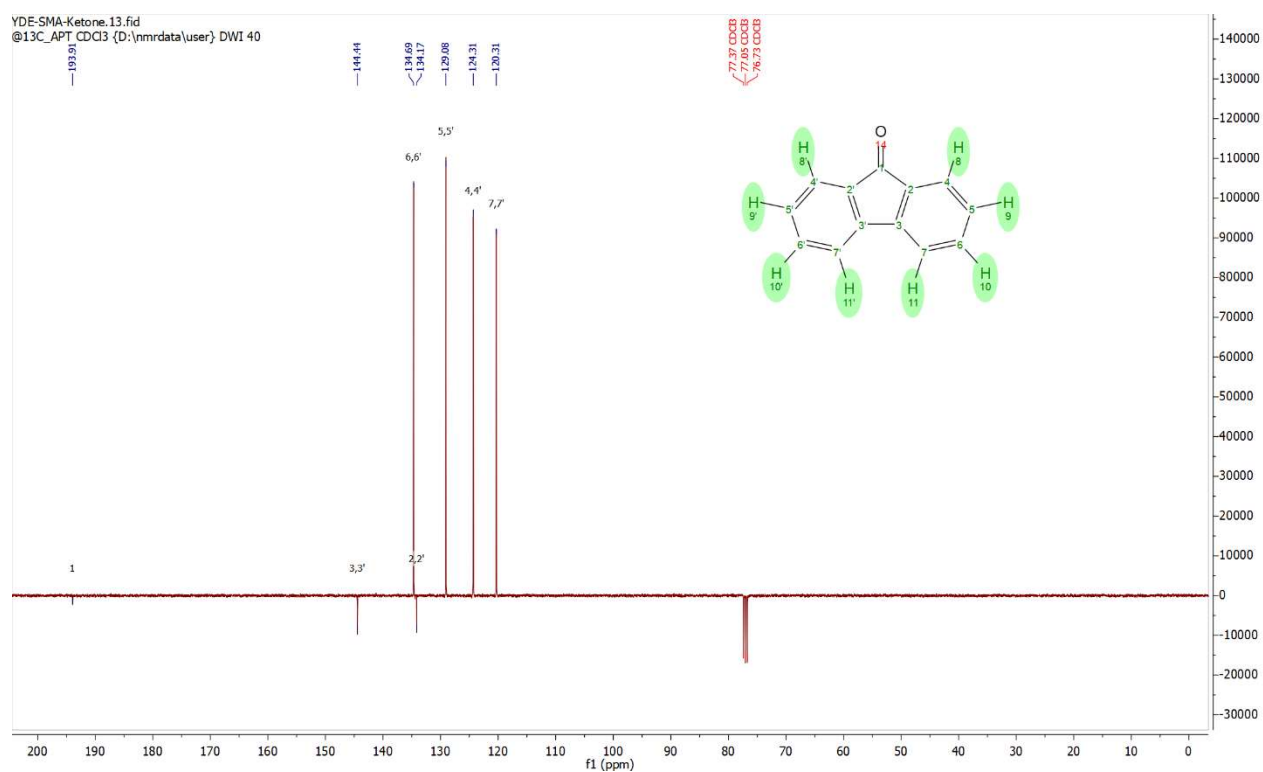

**Figure S12:** <sup>13</sup>C NMR Spectrum of 9-Fluorenone.
